# Supplementary material for: Biomarkers for Refractory Lupus Nephritis: A Microarray Study of Kidney Tissue
Source: MDPI journal article supplement (doi:10.3390/ijms160614276), 2015-06-23
Supplement: s1 [file s1]

## Supplementary Information

**Table S5.** Comparisons of the expressions of the 8 validated genes in LN non-responder (NR;  $N = 22$ ) and responder (R;  $N = 22$ ) patients.

|                             | R                  | NR               | <i>p</i> -Value |
|-----------------------------|--------------------|------------------|-----------------|
| <i>Up-regulated genes</i>   |                    |                  |                 |
| <i>ANXA13</i>               | $-0.006 \pm 0.75$  | $1.65 \pm 0.37$  | 0.04            |
| <i>VCAM1</i>                | $-0.007 \pm 0.29$  | $2.10 \pm 1.19$  | 0.09            |
| <i>VNN1</i>                 | $-0.0005 \pm 0.36$ | $0.97 \pm 1.21$  | 0.63            |
| <i>CXCR1</i>                | $-0.001 \pm 0.22$  | $0.59 \pm 0.30$  | 0.24            |
| <i>S100A8</i>               | $-0.07 \pm 0.30$   | $1.58 \pm 0.50$  | 0.02            |
| <i>Down-regulated genes</i> |                    |                  |                 |
| <i>CLDN19</i>               | $-0.005 \pm 0.26$  | $-0.87 \pm 0.31$ | 0.03            |
| <i>DDIT4</i>                | $-0.0005 \pm 0.28$ | $-0.60 \pm 0.31$ | 0.11            |
| <i>FAM46B</i>               | $-0.005 \pm 0.62$  | $-0.71 \pm 0.28$ | 0.02            |

Data shown as Mean  $\pm$  SEM log<sub>2</sub> fold change.

**Table S6.** Comparisons of the expressions of 4 validated genes in LN patients with loss of kidney function (L;  $N = 13$ ) and preserved kidney function (P;  $N = 31$ ).

|                             | L                | P                 | <i>p</i> -Value |
|-----------------------------|------------------|-------------------|-----------------|
| <i>Up-regulated genes</i>   |                  |                   |                 |
| <i>ANXA13</i>               | $1.61 \pm 0.15$  | $0.18 \pm 0.80$   | 0.34            |
| <i>COL8A1</i>               | $0.99 \pm 0.24$  | $-0.004 \pm 0.24$ | 0.007           |
| <i>Down-regulated genes</i> |                  |                   |                 |
| <i>SERPINA1</i>             | $-0.22 \pm 0.12$ | $-0.007 \pm 0.25$ | 0.45            |
| <i>TRPV6</i>                | $-0.06 \pm 0.27$ | $-0.004 \pm 0.22$ | 0.98            |

Data shown as Mean  $\pm$  SEM log<sub>2</sub> fold change.

**Table S7.** The sequences of oligonucleotide primers for real-time PCR validation.

| <b>TargetID</b> | <b>Oligonucleotides Sequence</b>                                                 |
|-----------------|----------------------------------------------------------------------------------|
| <i>ANXA13</i>   | Forward 5'-CAGGGTTTTGATGTGGATCGA-3'<br>Reverse 5'-TGCTTCATTGGTCCCCATTC-3'        |
| <i>VCAM1</i>    | Forward 5'-CCACAGTAAGGCAGGCTGTA-3'<br>Reverse 5'-GGTCACAGAGCCACCTTCTT-3'         |
| <i>VNN1</i>     | Forward 5'-GATCAGGGTGCGCATATTATTGT-3'<br>Reverse 5'-TTTACTTCAGGGTCTGGGATGTC-3'   |
| <i>CXCR1</i>    | Forward 5'-TGACTGGCAGATCCAGAGGTT-3'<br>Reverse 5'-ACTCAAAGTTTTCTGTCACTGATTGAG-3' |
| <i>SI00A8</i>   | Forward 5'-GAAGAAATTGCTAGAGACCGAGTG-3'<br>Reverse 5'-CGCCCATCTTTATCACCAGAA-3'    |
| <i>CLDN19</i>   | Forward 5'-TGGGTGGGCATCATTGC-3'<br>Reverse 5'-GTCGCCTGCGTAGGAAGACT-3'            |
| <i>DDIT4</i>    | Forward 5'-GGGTTCGCACACCCATTC-3'<br>Reverse 5'-GAGCGTAGAAGCCGCAGCTA-3'           |
| <i>FAM46B</i>   | Forward 5'-ACAGGTGAAGCGACTGGAC-3'<br>Reverse 5'-GTGCACATGTAGTCCCTGCT-3'          |
| <i>COL8A1</i>   | Forward 5'-AGCCCTTCCCCGATCCTCTC-3'<br>Reverse 5'-CACAACAGCTTCTTGAGCACG-3'        |
| <i>SERPINA1</i> | Forward 5'-TCCGATAACTGGGGTGACCT-3'<br>Reverse 5'-GCATTGTCGATTCACTGTCCC-3'        |
| <i>TRPV6</i>    | Forward 5'-TGGAGCAAGTTCTGCAGATGG-3'<br>Reverse 5'-AGACTCCCAGATCCTCTTCTGCT-3'     |
